# Supplementary material
Source: Elsevier journal article supplement (https://www.sciencedirect.com/science/article/pii/S0210480616000085)

## **Apéndice A:**

Gracias por completar este cuestionario. Las siguientes preguntas están diseñadas para medir el efecto que la estrechez de la uretra tiene sobre la vida de los pacientes.

A pesar de que algunas preguntas puedan parecer similares, en realidad no lo son. Rogamos emplee unos minutos de su tiempo para rellenar correctamente el cuestionario señalando la respuesta que mejor describa sus síntomas miccionales **durante el último mes**. Si actualmente es portador de una sonda vesical o catéter suprapúbico, por favor comience directamente en la página 4.

1.- Una vez decide orinar, ¿nota un retraso en el comienzo de la micción?

- Nunca ☐
- Ocasionalmente ☐
- A veces ☐
- La mayoría de las veces ☐
- Siempre ☐

2.- Describiría la fuerza de su chorro de orina como...

- Normal ☐
- Disminuida ocasionalmente ☐
- Disminuida a veces ☐
- Disminuida la mayoría de las veces ☐
- Disminuida siempre ☐

3.- ¿Necesita hacer fuerza / presión abdominal para seguir orinando?

- Nunca ☐
- Ocasionalmente ☐
- A veces ☐
- La mayoría de las veces ☐
- Siempre ☐

4.- Mientras orina, ¿tiene que parar y empezar de nuevo más de una vez?

- Nunca ☐
- Ocasionalmente ☐
- A veces ☐
- La mayoría de las veces ☐
- Siempre ☐

5.- ¿Con qué frecuencia, después de haber terminado de orinar, tiene la sensación de no haber vaciado completamente la vejiga?

- Nunca ☐
- Ocasionalmente ☐
- A veces ☐
- La mayoría de las veces ☐
- Siempre ☐

6.- ¿Con qué frecuencia ha notado haber mojado/manchado los calzoncillos unos minutos después de haber orinado y haberse subido los pantalones?

- Nunca ☐
- Ocasionalmente ☐
- A veces ☐
- La mayoría de las veces ☐
- Siempre ☐

7.- En general, ¿cuánto diría que afectan a su vida sus síntomas urinarios?

- |          |                          |
|----------|--------------------------|
| Nada     | <input type="checkbox"/> |
| Un poco  | <input type="checkbox"/> |
| Bastante | <input type="checkbox"/> |
| Mucho    | <input type="checkbox"/> |

8.- Marque con un círculo el número que correspondería a la fuerza de su chorro miccional en el último mes.

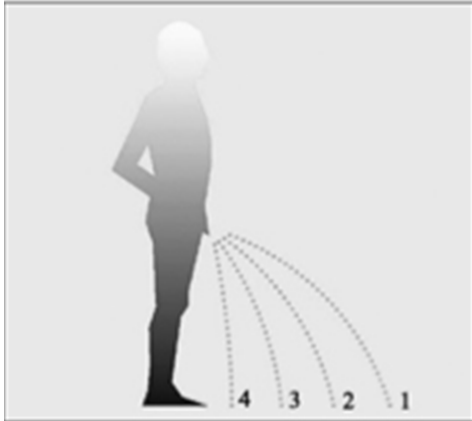

(Peeling 1989)

9.- ¿Está usted satisfecho con el resultado de la intervención?

- |                      |                          |
|----------------------|--------------------------|
| Sí, muy satisfecho   | <input type="checkbox"/> |
| Sí, satisfecho       | <input type="checkbox"/> |
| No, insatisfecho     | <input type="checkbox"/> |
| No, muy insatisfecho | <input type="checkbox"/> |

10.- En caso de estar insatisfecho o muy insatisfecho es porque:

- |                                                                           |                          |
|---------------------------------------------------------------------------|--------------------------|
| La situación miccional no ha mejorado.                                    | <input type="checkbox"/> |
| La situación miccional ha mejorado pero ha habido otros problemas.        | <input type="checkbox"/> |
| La situación miccional no ha mejorado y además ha habido otros problemas. | <input type="checkbox"/> |

Marque con una cruz la opción de cada grupo que mejor describa su estado de salud a día de hoy:

**Movilidad:**

- |                                  |                          |
|----------------------------------|--------------------------|
| No tengo problemas al andar      | <input type="checkbox"/> |
| Tengo algunos problemas al andar | <input type="checkbox"/> |
| No puedo andar y estoy en cama   | <input type="checkbox"/> |

**Autocuidado:**

- |                                                               |                          |
|---------------------------------------------------------------|--------------------------|
| No tengo problemas con mi autocuidados                        | <input type="checkbox"/> |
| Tengo algunos problemas con mi higiene personal y al vestirme | <input type="checkbox"/> |
| No puedo lavarme o vestirme por mí mismo                      | <input type="checkbox"/> |

**Actividades cotidianas (empleo, trabajo en casa, estudio, deporte,...):**

- |                                                                |                          |
|----------------------------------------------------------------|--------------------------|
| No tengo problemas al realizar mi actividades cotidianas       | <input type="checkbox"/> |
| Tengo algunos problemas al realizar mis actividades cotidianas | <input type="checkbox"/> |
| No puedo realizar mis actividades cotidianas                   | <input type="checkbox"/> |

**Dolor/molestias:**

- No tengo dolor ni molestias☐
- Tengo dolor o molestias moderados☐
- Tengo mucho dolor o molestias☐

**Ansiedad/depresión:**

- No estoy ansioso o deprimido☐
- Estoy moderadamente ansioso o deprimido☐
- Estoy muy ansioso o deprimido☐

Para ayudarnos a saber cómo de bueno o malo es su estado de salud hemos dibujado una escala (como un termómetro) en la que el 100 correspondería al mejor estado de salud que pueda imaginar y el 0 al peor.

Nos gustaría que nos indicara como de bien o mal piensa que está su estado de salud a día de hoy.

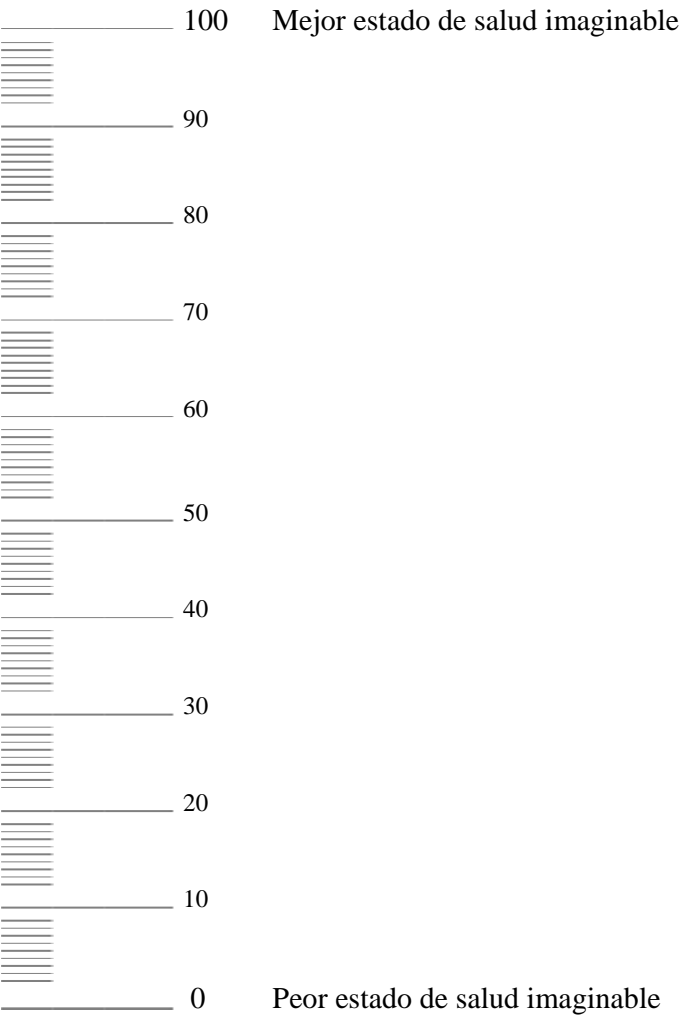

Supplement: mmc1 [file S0210480616000085:mmc1.pdf]
